# Supplementary material for: Pathways to coexistence with dingoes across Australian farming landscapes
Source: Frontiers journal article supplement (doi:10.3389/fcosc.2023.1126140), 2023-03-08
Supplement: Data_Sheet_1.PDF [file Data_Sheet_1.PDF]

## **Supplementary Material: Interview guide**

### **Interview questions for livestock producers**

#### **Part 1: About your farming enterprise**

- Can you please provide a description and overview of your property (the size, type of terrain, number of staff).
- Can you describe the neighbouring properties and/or landscapes (e.g. national park, grazing land etc.)?
- What is the history of the property (i.e., for how long has it been used in the past, how long has it been grazed for)?
- US only- Do you graze on a farm or public allotment?
- US only- For how long have you grazed on a farm or public allotment?
- What livestock do you graze? What are the breeds?
- Do local predators influence your choice of breeds e.g. choosing for herding or more aggression, why?
- Do you have a general philosophy around livestock production?
- What season do you lamb/calve?

#### **Part 2: Interactions with local wildlife**

- What wildlife inhabits or moves through the land you graze on?
- What are the interactions that occur on your land between yourself/workers, livestock and wildlife?
- What is your attitude toward local carnivores?
- What are your yearly livestock losses (e.g. how many, what are the causes of loss?)
- What are your yearly livestock losses to carnivores, how is that trending in relation to past years?
- What actions do you take to mitigate livestock losses to carnivores?  
(If actions are non- predominantly lethal go to part 3, if actions are predominantly lethal go to part 4).

#### **Part 3: Non-lethal ways to mitigate livestock losses to predators**

- What actions or strategies are you taking to manage depredation on the farm?
- How efficient/effective are each of these strategies and why?
- How much \$m is spent annually on risk mitigation?
- For how long have you been using non-lethal tools and practices?
- When are your livestock most vulnerable to depredation? Do you use extra strategies during this time?
- Do you have a threshold of acceptability for predation e.g. 10% losses annually.
- What were the specific reasons that you decided to use non-lethal tools and practices?
- Before using non-lethal tools and practices what actions were you taking to reduce livestock losses from predators on your land?
- Can you estimate the value or numbers of losses before using non-lethal tools and practices?

- What have been some of the benefits of using non-lethal tools and practices
  - What changes have you noticed in terms of livestock?
  - What have been some of the changes have you noticed in terms of local wildlife?
- What are the disadvantages of non-lethal tools and practices?
- What are the economic and time costs associated with implementing non-lethal tools and practices?
- Have losses been reduced since you implemented non-lethal tools and practices and why?
- Tell me about the barriers you faced in adopting non-lethal tools and practices
- Are there any benefits to having predators on or around your farm?
- Would you expect a higher return for farming in a more predator friendly way. If so how much?
- What are your trusted sources of information? E.g neighbours, other ranchers etc.
- Do you believe that using non-lethal can support producer livelihoods and conserve wildlife in production landscapes? Why/why not
- Are your neighbours using non-lethal, if not have you discussed this issue with your neighbours, friends etc?
- Do you feel pressure socially to use lethal control?

#### **Part 4: Lethal ways to mitigate livestock losses to predators**

- What actions or strategies are you taking to manage depredation on the farm?
- How much \$m is spent on overall depredation mitigation?
- How much is spent on lethal control (e.g bullets, hiring people to shoot etc).
- Is lethal control undertaken by staff or outsourced to government or hunters?
- How effective are these strategies to reduce livestock depredation?
- Have you heard of non-lethal tools and practices? Y/N
- What if any practices do you do that can be considered non-lethal to predators to mitigate loss? What was the outcome/s?
- How efficient/effective are each non-lethal deterrents?
- What barriers did you experience in trying non-lethal deterrents.
- What might encourage them to try a non-lethal practice?
- Do you have any neighbours or people in your social network that use non-lethal approaches to managing predators? yes what have they told you about their experiences with these practices.

## Interview questions for government representatives

### Part 1: Overview of human-carnivore conflict

- What species of carnivores are implicated in the conflict with livestock industries?
- Who are the key stakeholders/actions involved in the conflict?
  - What are the broad roles and responsibilities of these key stakeholders?
- How does your department count populations of large carnivores or assess impacts on livestock industries?

### Part 2: Approaches to manage conflict or promote coexistence

- What are the various ways that human -carnivore conflicts are currently being managed by your department?
- What tools or practices are advocated by your department and why?
- What research is drawn upon to support this position?
- What are your reflections on the effectiveness lethal tools and practices?
- What are your reflections on the effectiveness non-lethal lethal tools and practices?
- Where does your organisation access information about non-lethal tools and practices? How did you acquire this information?
- What are the benefits of carnivores existing in production landscapes?
  - Prompts capture economic, cultural, ecological benefits.
- What is the role of the government in bringing about change on this issue?
  - What are the barriers for implementing this change?
- How do state government policies influence the human-carnivore conflict in the region?
- What are the leverage points for change on the human-carnivore conflict?
- What are the barriers to the adoption of non-lethal tools and practices in Agricultural landscapes?  
What is the government dept doing to overcome these barriers (solutions)?
- How can these solutions be implemented and who is responsible for this?
- What is your vision for the future on this issue out to 2040?
- Can you identify other government representative to discuss this issue with to understand the various policy perspectives?
